# Supplementary material
Source: HighWire-hosted journal article supplement (https://www.annals.org/content/suppl/2004/02/12/136.11.802)
Supplement: 136-11-802-appendix1.pdf [file 136-11-802-appendix1.pdf]

## Barthel Index\*

To begin, I'd like to ask you about your current ability to perform some common activities. Do you need assistance for [READ ACTIVITY].

|                                           |                                                                              |   |
|-------------------------------------------|------------------------------------------------------------------------------|---|
| 1. Eating?                                | No – Able to put on any assistance device; eats in reasonable time           | 2 |
|                                           | Yes – Needs assistance (e.g., for cutting up food)                           | 1 |
|                                           | Yes – Dependent                                                              | 0 |
| 2. Transferring<br>between bed and chair? | No – Can lock a wheelchair, lift footrests, get out                          | 3 |
|                                           | Yes – Needs minimum assistance or supervision                                | 2 |
|                                           | Yes – Able to sit but needs maximum assistance to transfer                   | 1 |
| 3. Grooming?                              | Yes – Dependent                                                              | 0 |
|                                           | No – Can wash face, comb hair, brush teeth                                   | 1 |
|                                           | Yes – Needs assistance with grooming                                         | 0 |
| 4. Using a toilet?                        | No – Can get on and off, handle clothes, wipe, empty and clean bedpan        | 2 |
|                                           | Yes – Needs assistance for balance, handling clothes, or toilet paper        | 1 |
|                                           | Yes – Dependent                                                              | 0 |
| 5. Bathing?                               | No – Can use bathtub, shower, or sponge bath with no supervision             | 1 |
|                                           | Yes – Dependent                                                              | 0 |
| 6. Walking for 50 yards?                  | No (may use assistive device, except for rolling walker)                     | 3 |
|                                           | Yes – Needs assistance to walk 50 yards                                      | 2 |
|                                           | Yes – Unable to walk but independent with wheelchair for 50 yards            | 1 |
| 7. Climbing stairs?                       | Yes – Dependent                                                              | 0 |
|                                           | No – Can climb up and down (may use assistive devices)                       | 2 |
|                                           | Yes – Needs assistance or supervision                                        | 1 |
| 8. Dressing?                              | Unable to do, even with assistance                                           | 0 |
|                                           | No – Can tie shoes, fasten fasteners, undress                                | 2 |
|                                           | Yes – Needs assistance but does at least half of task within reasonable time | 1 |
| 9. Controlling your<br>bladder?           | Yes – Dependent                                                              | 0 |
|                                           | No accidents (able to care for collecting device, if used)                   | 2 |
|                                           | Has occasional accidents (<1/d) or needs help with external device           | 1 |
| 10. Controlling your<br>bowels?           | Incontinent                                                                  | 0 |
|                                           | No accidents (able to use enema or suppository, if needed)                   | 2 |
|                                           | Has occasional accidents (<1/wk) or needs help with enema or suppository     | 1 |
|                                           | Incontinent                                                                  | 0 |

\*Adapted from reference 28. Modified scoring from reference 29.
