# Supplementary material
Source: HighWire-hosted journal article supplement (https://www.annals.org/content/suppl/2004/02/12/136.11.802)
Supplement: 136-11-802-appendix2.pdf [file 136-11-802-appendix2.pdf]

## Physical Performance Test\*

| Measure of Function                                    | Performance                                                                     | Score                                                                                               |
|--------------------------------------------------------|---------------------------------------------------------------------------------|-----------------------------------------------------------------------------------------------------|
| 1. Write a sentence ("Whales live in the blue ocean.") | Number of seconds                                                               | <10 s = 4<br>10.5–15 s = 3<br>15.5–20 s = 2<br>>20 s = 1<br>Unable = 0<br>Unable due to safety = 0  |
| 2. Simulate eating                                     | Number of seconds                                                               | <10 s = 4<br>10.5–15 s = 3<br>15.5–20 s = 2<br>>20 s = 1<br>Unable = 0<br>Unable due to safety = 0  |
| 3. Lift a book and put in interviewer's hands          | Number of seconds                                                               | ≤2 s = 4<br>2.5–4 s = 3<br>4.5–6 s = 2<br>>6 s = 1<br>Unable = 0<br>Unable due to safety = 0        |
| 4. Put on and remove a jacket                          | Number of seconds                                                               | <10 s = 4<br>10.5–15 s = 3<br>15.5–20 s = 2<br>>20 s = 1<br>Unable = 0<br>Unable due to safety = 0  |
| 5. Pick up penny from floor                            | Number of seconds                                                               | ≤2 s = 4<br>2.5–4 s = 3<br>4.5–6 s = 2<br>>6 s = 1<br>Unable = 0<br>Unable due to safety = 0        |
| 6. Turn 360 degrees                                    | Continuous steps<br>Discontinuous steps<br>Steady<br>Unsteady (grabs, staggers) | 2<br>0<br>2<br>0                                                                                    |
| 7. Walk 50 feet                                        | Number of seconds                                                               | ≤ 15 s = 4<br>15.5–20 s = 3<br>20.5–25 s = 2<br>>25 s = 1<br>Unable = 0<br>Unable due to safety = 0 |

\*Adapted from reference 31.
